# Supplementary material for: Measuring older people’s socioeconomic position: a scoping review of studies of self-rated health, health service and social care use
Source: HighWire-hosted journal article supplement (doi:10.1136/jech-2021-218265), 2022-03-15
Supplement: jech-2021-218265supp001_data_supplement.pdf [file jech-2021-218265supp001_data_supplement.pdf]

## SUPPLEMENTARY MATERIALS

Search strategy (Medline)

**Medline Ovid MEDLINE(R) and In-Process & Other Non-Indexed Citations** 1946 to September 22, 2020**Date searched:** 24/09/2020

```
1      wealth.m_titl.
2      income.m_titl.
3      economic.m_titl.
4      financial.m_titl.
5      socio-economic.m_titl.
6      socioeconomic.m_titl.
7      "asset*".m_titl.
8      resources.m_titl.
9      "inequalit*".m_titl. 9988
10     1 or 2 or 3 or 4 or 5 or 6 or 7 or 8 or 9
11     "old*".m_titl.
12     limit 11 to yr="2000 -Current"
13     elderly.m_titl.
14     limit 13 to yr="2000 -Current"
15     retire.m_titl.
16     limit 15 to yr="2000 -Current"
17     12 or 14 or 16
18     10 and 17
19     age.m_titl.
20     limit 19 to yr="2000 -Current"
21     12 or 14 or 16 or 20
22     10 and 21
```

Table S1. Overview of studies (shaded cell indicates measure used)

| STUDY AUTHOR        | DATE | Outcome group                            | Lower age threshold | COUNTRY          | Education | (Net) Assets | Housing tenure | House value | Housing conditions | Occupational class/employment | Income | Area deprivation or other area level | Subjective SES | Health insurance status | Car ownership | % of life working part time | Geography of residence | Marital status | Composite measure | Living arrangements | Out of pocket healthcare payments | Poverty income ratio | Poverty threshold status | Household material deprivation | Access to healthcare |  |
|---------------------|------|------------------------------------------|---------------------|------------------|-----------|--------------|----------------|-------------|--------------------|-------------------------------|--------|--------------------------------------|----------------|-------------------------|---------------|-----------------------------|------------------------|----------------|-------------------|---------------------|-----------------------------------|----------------------|--------------------------|--------------------------------|----------------------|--|
| Adjei               | 2017 | Self-rated health                        | 65                  | Multiple         |           |              |                |             |                    |                               |        |                                      |                |                         |               |                             |                        |                |                   |                     |                                   |                      |                          |                                |                      |  |
| Ahn                 | 2012 | Self-rated health                        | 60                  | US               |           |              |                |             |                    |                               |        |                                      |                |                         |               |                             |                        |                |                   |                     |                                   |                      |                          |                                |                      |  |
| Aida                | 2011 | Self-rated health                        | 65                  | Japan            |           |              |                |             |                    |                               |        |                                      |                |                         |               |                             |                        |                |                   |                     |                                   |                      |                          |                                |                      |  |
| Allen               | 2011 | Health service use                       | 65                  | Canada           |           |              |                |             |                    |                               |        |                                      |                |                         |               |                             |                        |                |                   |                     |                                   |                      |                          |                                |                      |  |
| Allin               | 2009 | Health service use                       | 65                  | Multiple         |           |              |                |             |                    |                               |        |                                      |                |                         |               |                             |                        |                |                   |                     |                                   |                      |                          |                                |                      |  |
| Alwan               | 2007 | Health service use and self-rated health | 65                  | UK               |           |              |                |             |                    |                               |        |                                      |                |                         |               |                             |                        |                |                   |                     |                                   |                      |                          |                                |                      |  |
| Ament               | 2012 | Self-rated health                        | 70                  | Netherlands      |           |              |                |             |                    |                               |        |                                      |                |                         |               |                             |                        |                |                   |                     |                                   |                      |                          |                                |                      |  |
| Ancona              | 2007 | Health service use                       | 75                  | Italy            |           |              |                |             |                    |                               |        |                                      |                |                         |               |                             |                        |                |                   |                     |                                   |                      |                          |                                |                      |  |
| Angel               | 2003 | Self-rated health                        | 64                  | US               |           |              |                |             |                    |                               |        |                                      |                |                         |               |                             |                        |                |                   |                     |                                   |                      |                          |                                |                      |  |
| Aschan-Leygonie     | 2013 | Health service use                       | 65                  | France           |           |              |                |             |                    |                               |        |                                      |                |                         |               |                             |                        |                |                   |                     |                                   |                      |                          |                                |                      |  |
| Assari              | 2020 | Self-rated health                        | 65                  | USA              |           |              |                |             |                    |                               |        |                                      |                |                         |               |                             |                        |                |                   |                     |                                   |                      |                          |                                |                      |  |
| Auchincloss         | 2001 | Health service use                       | 65                  | US               |           |              |                |             |                    |                               |        |                                      |                |                         |               |                             |                        |                |                   |                     |                                   |                      |                          |                                |                      |  |
| Bambra              | 2010 | Self-rated health                        | 60                  | Multiple         |           |              |                |             |                    |                               |        |                                      |                |                         |               |                             |                        |                |                   |                     |                                   |                      |                          |                                |                      |  |
| Breeze              | 2001 | Self-rated health                        | 67                  | UK               |           |              |                |             |                    |                               |        |                                      |                |                         |               |                             |                        |                |                   |                     |                                   |                      |                          |                                |                      |  |
| Cain                | 2017 | Self-rated health                        | 65                  | USA              |           |              |                |             |                    |                               |        |                                      |                |                         |               |                             |                        |                |                   |                     |                                   |                      |                          |                                |                      |  |
| Cohen               | 2013 | Health service use                       | 65                  | Canada           |           |              |                |             |                    |                               |        |                                      |                |                         |               |                             |                        |                |                   |                     |                                   |                      |                          |                                |                      |  |
| Connelly            | 2010 | Self-rated health                        | 65                  | Northern Ireland |           |              |                |             |                    |                               |        |                                      |                |                         |               |                             |                        |                |                   |                     |                                   |                      |                          |                                |                      |  |
| Dalstra             | 2006 | Self-rated health                        | 60                  | Multiple         |           |              |                |             |                    |                               |        |                                      |                |                         |               |                             |                        |                |                   |                     |                                   |                      |                          |                                |                      |  |
| Elovainio           | 2000 | Self-rated health                        | 75                  | Finland          |           |              |                |             |                    |                               |        |                                      |                |                         |               |                             |                        |                |                   |                     |                                   |                      |                          |                                |                      |  |
| Enroth              | 2013 | Self-rated health                        | 90                  | US               |           |              |                |             |                    |                               |        |                                      |                |                         |               |                             |                        |                |                   |                     |                                   |                      |                          |                                |                      |  |
| Enroth              | 2019 | Self-rated health                        | 75                  | Multiple         |           |              |                |             |                    |                               |        |                                      |                |                         |               |                             |                        |                |                   |                     |                                   |                      |                          |                                |                      |  |
| Evans               | 2008 | Self-rated health                        | 60                  | USA              |           |              |                |             |                    |                               |        |                                      |                |                         |               |                             |                        |                |                   |                     |                                   |                      |                          |                                |                      |  |
| Fernandez-Martinez  | 2012 | Self-rated health                        | 60                  | Spain            |           |              |                |             |                    |                               |        |                                      |                |                         |               |                             |                        |                |                   |                     |                                   |                      |                          |                                |                      |  |
| Fernandez-Mayorales | 2000 | Health service use                       | 65                  | Spain            |           |              |                |             |                    |                               |        |                                      |                |                         |               |                             |                        |                |                   |                     |                                   |                      |                          |                                |                      |  |
| Fors                | 2015 | Self-rated health                        | 77                  | Sweden           |           |              |                |             |                    |                               |        |                                      |                |                         |               |                             |                        |                |                   |                     |                                   |                      |                          |                                |                      |  |
| Francois            | 2011 | Health service use                       | 65                  | Belgium          |           |              |                |             |                    |                               |        |                                      |                |                         |               |                             |                        |                |                   |                     |                                   |                      |                          |                                |                      |  |
| Franse <sup>a</sup> | 2017 | Self-rated health                        | 70                  | Netherlands      |           |              |                |             |                    |                               |        |                                      |                |                         |               |                             |                        |                |                   |                     |                                   |                      |                          |                                |                      |  |
| Freedman            | 2004 | Health service use                       | 65                  | US               |           |              |                |             |                    |                               |        |                                      |                |                         |               |                             |                        |                |                   |                     |                                   |                      |                          |                                |                      |  |
| Fukuda <sup>a</sup> | 2015 | Health service use                       | 65                  | Japan            |           |              |                |             |                    |                               |        |                                      |                |                         |               |                             |                        |                |                   |                     |                                   |                      |                          |                                |                      |  |

| STUDY AUTHOR            | DATE | Outcome group      | Lower age threshold | COUNTRY          | Education | (Net) Assets | Housing tenure | House value | Housing conditions | Occupational class/employment | Income | Area deprivation or other area level | Subjective SES | Health insurance status | Car ownership | % of life working part time | Geography of residence | Marital status | Composite measure | Living arrangements | Out of pocket healthcare payments | Poverty income ratio | Poverty threshold status | Household material deprivation | Access to healthcare |  |
|-------------------------|------|--------------------|---------------------|------------------|-----------|--------------|----------------|-------------|--------------------|-------------------------------|--------|--------------------------------------|----------------|-------------------------|---------------|-----------------------------|------------------------|----------------|-------------------|---------------------|-----------------------------------|----------------------|--------------------------|--------------------------------|----------------------|--|
|                         |      |                    |                     |                  |           |              |                |             |                    |                               |        |                                      |                |                         |               |                             |                        |                |                   |                     |                                   |                      |                          |                                |                      |  |
| Gill                    | 2004 | Health service use | 77                  | Australia        |           |              |                |             |                    |                               |        |                                      |                |                         |               |                             |                        |                |                   |                     |                                   |                      |                          |                                |                      |  |
| Giron                   | 2012 | Self-rated health  | 65                  | Spain            |           |              |                |             |                    |                               |        |                                      |                |                         |               |                             |                        |                |                   |                     |                                   |                      |                          |                                |                      |  |
| Gomez-Baya <sup>a</sup> | 2020 | Self-rated health  | 65                  | Spain            |           |              |                |             |                    |                               |        |                                      |                |                         |               |                             |                        |                |                   |                     |                                   |                      |                          |                                |                      |  |
| Grau                    | 2001 | Self-rated health  | 65                  | USA              |           |              |                |             |                    |                               |        |                                      |                |                         |               |                             |                        |                |                   |                     |                                   |                      |                          |                                |                      |  |
| Grundy                  | 2007 | Social care use    | 65                  | Multiple         |           |              |                |             |                    |                               |        |                                      |                |                         |               |                             |                        |                |                   |                     |                                   |                      |                          |                                |                      |  |
| Grundy                  | 2003 | Self-rated health  | 65                  | UK               |           |              |                |             |                    |                               |        |                                      |                |                         |               |                             |                        |                |                   |                     |                                   |                      |                          |                                |                      |  |
| Hamada                  | 2019 | Health service use | 75                  | Japan            |           |              |                |             |                    |                               |        |                                      |                |                         |               |                             |                        |                |                   |                     |                                   |                      |                          |                                |                      |  |
| Hancock                 | 2002 | Social care use    | 75                  | UK               |           |              |                |             |                    |                               |        |                                      |                |                         |               |                             |                        |                |                   |                     |                                   |                      |                          |                                |                      |  |
| Hardy                   | 2011 | Health service use | 66                  | USA              |           |              |                |             |                    |                               |        |                                      |                |                         |               |                             |                        |                |                   |                     |                                   |                      |                          |                                |                      |  |
| Himes                   | 2000 | Social care use    | 70                  | USA and Germany  |           |              |                |             |                    |                               |        |                                      |                |                         |               |                             |                        |                |                   |                     |                                   |                      |                          |                                |                      |  |
| Hoebel <sup>a</sup>     | 2017 | Self-rated health  | 65                  | Germany          |           |              |                |             |                    |                               |        |                                      |                |                         |               |                             |                        |                |                   |                     |                                   |                      |                          |                                |                      |  |
| Hoeck                   | 2013 | Health service use | 65                  | Belgium          |           |              |                |             |                    |                               |        |                                      |                |                         |               |                             |                        |                |                   |                     |                                   |                      |                          |                                |                      |  |
| Honjo <sup>a</sup>      | 2006 | Self-rated health  | 61                  | Japan            |           |              |                |             |                    |                               |        |                                      |                |                         |               |                             |                        |                |                   |                     |                                   |                      |                          |                                |                      |  |
| Howard                  | 2006 | Self-rated health  | 65                  | USA              |           |              |                |             |                    |                               |        |                                      |                |                         |               |                             |                        |                |                   |                     |                                   |                      |                          |                                |                      |  |
| Huang                   | 2018 | Health service use | 65                  | US               |           |              |                |             |                    |                               |        |                                      |                |                         |               |                             |                        |                |                   |                     |                                   |                      |                          |                                |                      |  |
| Huijts                  | 2010 | Self-rated health  | 63                  | Denmark, Finland |           |              |                |             |                    |                               |        |                                      |                |                         |               |                             |                        |                |                   |                     |                                   |                      |                          |                                |                      |  |
| Ichida                  | 2009 | Self-rated health  | 65                  | Japan            |           |              |                |             |                    |                               |        |                                      |                |                         |               |                             |                        |                |                   |                     |                                   |                      |                          |                                |                      |  |
| Ilinca                  | 2017 | Social care use    | 60                  | Multiple         |           |              |                |             |                    |                               |        |                                      |                |                         |               |                             |                        |                |                   |                     |                                   |                      |                          |                                |                      |  |
| Illoabuchi              | 2014 | Health service use | 65                  | US               |           |              |                |             |                    |                               |        |                                      |                |                         |               |                             |                        |                |                   |                     |                                   |                      |                          |                                |                      |  |
| Jenkins                 | 2002 | Social care use    | 65                  | USA              |           |              |                |             |                    |                               |        |                                      |                |                         |               |                             |                        |                |                   |                     |                                   |                      |                          |                                |                      |  |
| Jenkins                 | 2020 | Social care use    | 65                  | USA              |           |              |                |             |                    |                               |        |                                      |                |                         |               |                             |                        |                |                   |                     |                                   |                      |                          |                                |                      |  |
| Jiang                   | 2020 | Health service use | 75                  | Japan            |           |              |                |             |                    |                               |        |                                      |                |                         |               |                             |                        |                |                   |                     |                                   |                      |                          |                                |                      |  |
| Jyvakorpi               | 2018 | Self-rated health  | 82                  | Finland          |           |              |                |             |                    |                               |        |                                      |                |                         |               |                             |                        |                |                   |                     |                                   |                      |                          |                                |                      |  |
| Kim                     | 2012 | Health service use | 65                  | Korea            |           |              |                |             |                    |                               |        |                                      |                |                         |               |                             |                        |                |                   |                     |                                   |                      |                          |                                |                      |  |
| Kim                     | 2011 | Self-rated health  | 65                  | Korea            |           |              |                |             |                    |                               |        |                                      |                |                         |               |                             |                        |                |                   |                     |                                   |                      |                          |                                |                      |  |
| Kim                     | 2017 | Self-rated health  | 65                  | Korea            |           |              |                |             |                    |                               |        |                                      |                |                         |               |                             |                        |                |                   |                     |                                   |                      |                          |                                |                      |  |
| Kim                     | 2008 | Self-rated health  | 65                  | Korea            |           |              |                |             |                    |                               |        |                                      |                |                         |               |                             |                        |                |                   |                     |                                   |                      |                          |                                |                      |  |
| Kiuchi                  | 2018 | Health service use | 65                  | Japan            |           |              |                |             |                    |                               |        |                                      |                |                         |               |                             |                        |                |                   |                     |                                   |                      |                          |                                |                      |  |
| Kiula                   | 2007 | Self-rated health  | 65                  | US               |           |              |                |             |                    |                               |        |                                      |                |                         |               |                             |                        |                |                   |                     |                                   |                      |                          |                                |                      |  |
| Knurowski               | 2005 | Self-rated health  | 65                  | Poland           |           |              |                |             |                    |                               |        |                                      |                |                         |               |                             |                        |                |                   |                     |                                   |                      |                          |                                |                      |  |
| Lakdawalla              | 2003 | Social care use    | 70                  | USA              |           |              |                |             |                    |                               |        |                                      |                |                         |               |                             |                        |                |                   |                     |                                   |                      |                          |                                |                      |  |
| Lasheras                | 2001 | Self-rated health  | 65                  | Spain            |           |              |                |             |                    |                               |        |                                      |                |                         |               |                             |                        |                |                   |                     |                                   |                      |                          |                                |                      |  |
| Law                     | 2017 | Health service use | 66                  | Canada           |           |              |                |             |                    |                               |        |                                      |                |                         |               |                             |                        |                |                   |                     |                                   |                      |                          |                                |                      |  |
| Lee                     | 2020 | Health service use | 65                  | US               |           |              |                |             |                    |                               |        |                                      |                |                         |               |                             |                        |                |                   |                     |                                   |                      |                          |                                |                      |  |
| Li                      | 2008 | Self-rated health  | 60                  | US               |           |              |                |             |                    |                               |        |                                      |                |                         |               |                             |                        |                |                   |                     |                                   |                      |                          |                                |                      |  |
| Lima-Costa              | 2012 | Self-rated health  | 60                  | England          |           |              |                |             |                    |                               |        |                                      |                |                         |               |                             |                        |                |                   |                     |                                   |                      |                          |                                |                      |  |

| STUDY AUTHOR          | DATE | Outcome group                            | Lower age threshold | COUNTRY          | Education | (Net) Assets | Housing tenure | House value | Housing conditions | Occupational class/employment | Income | Area deprivation or other area level | Subjective SES | Health insurance status | Car ownership | % of life working part time | Geography of residence | Marital status | Composite measure | Living arrangements | Out of pocket healthcare payments | Poverty income ratio | Poverty threshold status | Household material deprivation | Access to healthcare |
|-----------------------|------|------------------------------------------|---------------------|------------------|-----------|--------------|----------------|-------------|--------------------|-------------------------------|--------|--------------------------------------|----------------|-------------------------|---------------|-----------------------------|------------------------|----------------|-------------------|---------------------|-----------------------------------|----------------------|--------------------------|--------------------------------|----------------------|
| Lopez-de-Andres       | 2018 | Health service use and social care use   | 65                  | Spain            |           |              |                |             |                    |                               |        |                                      |                |                         |               |                             |                        |                |                   |                     |                                   |                      |                          |                                |                      |
| Low                   | 2009 | Self-rated health                        | 60                  | Canada           |           |              |                |             |                    |                               |        |                                      |                |                         |               |                             |                        |                |                   |                     |                                   |                      |                          |                                |                      |
| Luchetti              | 2009 | Health service use                       | 70                  | Italy            |           |              |                |             |                    |                               |        |                                      |                |                         |               |                             |                        |                |                   |                     |                                   |                      |                          |                                |                      |
| Lum                   | 2004 | Self-rated health                        | 70                  | USA              |           |              |                |             |                    |                               |        |                                      |                |                         |               |                             |                        |                |                   |                     |                                   |                      |                          |                                |                      |
| Lupi-Pegurier         | 2011 | Health service use                       | 60                  | France           |           |              |                |             |                    |                               |        |                                      |                |                         |               |                             |                        |                |                   |                     |                                   |                      |                          |                                |                      |
| Maniecka-Bryła        | 2011 | Self-rated health                        | 65                  | Poland           |           |              |                |             |                    |                               |        |                                      |                |                         |               |                             |                        |                |                   |                     |                                   |                      |                          |                                |                      |
| Martinkainen          | 2009 | Social care use                          | 65                  | Finland          |           |              |                |             |                    |                               |        |                                      |                |                         |               |                             |                        |                |                   |                     |                                   |                      |                          |                                |                      |
| Martinkainen          | 2008 | Social care use                          | 65                  | Finland          |           |              |                |             |                    |                               |        |                                      |                |                         |               |                             |                        |                |                   |                     |                                   |                      |                          |                                |                      |
| Mather                | 2014 | Self-rated health                        | 65                  | Australia        |           |              |                |             |                    |                               |        |                                      |                |                         |               |                             |                        |                |                   |                     |                                   |                      |                          |                                |                      |
| McCann                | 2011 | Social care use                          | 65                  | Northern Ireland |           |              |                |             |                    |                               |        |                                      |                |                         |               |                             |                        |                |                   |                     |                                   |                      |                          |                                |                      |
| McFadden <sup>a</sup> | 2008 | Self-rated health                        | 60                  | UK               |           |              |                |             |                    |                               |        |                                      |                |                         |               |                             |                        |                |                   |                     |                                   |                      |                          |                                |                      |
| McMunn <sup>a</sup>   | 2009 | Self-rated health                        | 60                  | UK               |           |              |                |             |                    |                               |        |                                      |                |                         |               |                             |                        |                |                   |                     |                                   |                      |                          |                                |                      |
| Merlo                 | 2003 | Health service use                       | 60                  | Sweden           |           |              |                |             |                    |                               |        |                                      |                |                         |               |                             |                        |                |                   |                     |                                   |                      |                          |                                |                      |
| Mishra                | 2004 | Health service use                       | 70                  | Australia        |           |              |                |             |                    |                               |        |                                      |                |                         |               |                             |                        |                |                   |                     |                                   |                      |                          |                                |                      |
| Muckenhuber           | 2014 | Self-rated health                        | 70                  | Austria          |           |              |                |             |                    |                               |        |                                      |                |                         |               |                             |                        |                |                   |                     |                                   |                      |                          |                                |                      |
| Munford               | 2017 | Health service use                       | 65                  | UK               |           |              |                |             |                    |                               |        |                                      |                |                         |               |                             |                        |                |                   |                     |                                   |                      |                          |                                |                      |
| Murata                | 2019 | Health service use and social care use   | 75                  | Japan            |           |              |                |             |                    |                               |        |                                      |                |                         |               |                             |                        |                |                   |                     |                                   |                      |                          |                                |                      |
| Nicklett              | 2011 | Self-rated health                        | 65                  | US               |           |              |                |             |                    |                               |        |                                      |                |                         |               |                             |                        |                |                   |                     |                                   |                      |                          |                                |                      |
| Niefield              | 2005 | Health service use                       | 65                  | US               |           |              |                |             |                    |                               |        |                                      |                |                         |               |                             |                        |                |                   |                     |                                   |                      |                          |                                |                      |
| Nieman                | 2014 | Health service use                       | 70                  | US               |           |              |                |             |                    |                               |        |                                      |                |                         |               |                             |                        |                |                   |                     |                                   |                      |                          |                                |                      |
| Nihtila               | 2007 | Social care use                          | 65                  | Finland          |           |              |                |             |                    |                               |        |                                      |                |                         |               |                             |                        |                |                   |                     |                                   |                      |                          |                                |                      |
| Nihtila               | 2008 | Social care use                          | 65                  | Finland          |           |              |                |             |                    |                               |        |                                      |                |                         |               |                             |                        |                |                   |                     |                                   |                      |                          |                                |                      |
| Nummela               | 2007 | Self-rated health                        | 62                  | Finland          |           |              |                |             |                    |                               |        |                                      |                |                         |               |                             |                        |                |                   |                     |                                   |                      |                          |                                |                      |
| Orfila                | 2000 | Self-rated health                        | 65                  | Spain            |           |              |                |             |                    |                               |        |                                      |                |                         |               |                             |                        |                |                   |                     |                                   |                      |                          |                                |                      |
| Ornstein              | 2020 | Social care use                          | 65                  | US               |           |              |                |             |                    |                               |        |                                      |                |                         |               |                             |                        |                |                   |                     |                                   |                      |                          |                                |                      |
| Otaki                 | 2017 | Self-rated health                        | 70                  | Japan            |           |              |                |             |                    |                               |        |                                      |                |                         |               |                             |                        |                |                   |                     |                                   |                      |                          |                                |                      |
| Park                  | 2020 | Social care use                          | 65                  | US               |           |              |                |             |                    |                               |        |                                      |                |                         |               |                             |                        |                |                   |                     |                                   |                      |                          |                                |                      |
| Park                  | 2014 | Health service use and self-rated health | 65                  | South Korea      |           |              |                |             |                    |                               |        |                                      |                |                         |               |                             |                        |                |                   |                     |                                   |                      |                          |                                |                      |
| Park                  | 2009 | Self-rated health                        | 65                  | Korea            |           |              |                |             |                    |                               |        |                                      |                |                         |               |                             |                        |                |                   |                     |                                   |                      |                          |                                |                      |
| Patel                 | 2007 | Health service use                       | 60                  | UK               |           |              |                |             |                    |                               |        |                                      |                |                         |               |                             |                        |                |                   |                     |                                   |                      |                          |                                |                      |
| Pirani                | 2012 | Self-rated health                        | 65                  | Italy            |           |              |                |             |                    |                               |        |                                      |                |                         |               |                             |                        |                |                   |                     |                                   |                      |                          |                                |                      |
| Pirani                | 2012 | Self-rated health                        | 65                  | Italy            |           |              |                |             |                    |                               |        |                                      |                |                         |               |                             |                        |                |                   |                     |                                   |                      |                          |                                |                      |

| STUDY AUTHOR             | DATE | Outcome group      | Lower age threshold | COUNTRY  | Education | (Net) Assets | Housing tenure | House value | Housing conditions | Occupational class/employment | Income | Area deprivation or other area level | Subjective SES | Health insurance status | Car ownership | % of life working part time | Geography of residence | Marital status | Composite measure | Living arrangements | Out of pocket healthcare payments | Poverty income ratio | Poverty threshold status | Household material deprivation | Access to healthcare |
|--------------------------|------|--------------------|---------------------|----------|-----------|--------------|----------------|-------------|--------------------|-------------------------------|--------|--------------------------------------|----------------|-------------------------|---------------|-----------------------------|------------------------|----------------|-------------------|---------------------|-----------------------------------|----------------------|--------------------------|--------------------------------|----------------------|
| Piumatti                 | 2017 | Self-rated health  | 65                  | Italy    |           |              |                |             |                    |                               |        |                                      |                |                         |               |                             |                        |                |                   |                     |                                   |                      |                          |                                |                      |
| Prajsner                 | 2015 | Health service use | 65                  | Poland   |           |              |                |             |                    |                               |        |                                      |                |                         |               |                             |                        |                |                   |                     |                                   |                      |                          |                                |                      |
| Prajsner                 | 2016 | Health service use | 65                  | Poland   |           |              |                |             |                    |                               |        |                                      |                |                         |               |                             |                        |                |                   |                     |                                   |                      |                          |                                |                      |
| Ramsay                   | 2018 | Self-rated health  | 71                  | UK       |           |              |                |             |                    |                               |        |                                      |                |                         |               |                             |                        |                |                   |                     |                                   |                      |                          |                                |                      |
| Rathore                  | 2006 | Health service use | 65                  | US       |           |              |                |             |                    |                               |        |                                      |                |                         |               |                             |                        |                |                   |                     |                                   |                      |                          |                                |                      |
| Reyes-Ortiz              | 2010 | Health service use | 75                  | US       |           |              |                |             |                    |                               |        |                                      |                |                         |               |                             |                        |                |                   |                     |                                   |                      |                          |                                |                      |
| Robert                   | 2009 | Self-rated health  | 65                  | US       |           |              |                |             |                    |                               |        |                                      |                |                         |               |                             |                        |                |                   |                     |                                   |                      |                          |                                |                      |
| Robert                   | 2002 | Self-rated health  | 60                  | US       |           |              |                |             |                    |                               |        |                                      |                |                         |               |                             |                        |                |                   |                     |                                   |                      |                          |                                |                      |
| Roberts <sup>a</sup>     | 2001 | Self-rated health  | 60                  | US       |           |              |                |             |                    |                               |        |                                      |                |                         |               |                             |                        |                |                   |                     |                                   |                      |                          |                                |                      |
| Rodrigues                | 2017 | Social care use    | 60                  | Multiple |           |              |                |             |                    |                               |        |                                      |                |                         |               |                             |                        |                |                   |                     |                                   |                      |                          |                                |                      |
| Roe-Prior                | 2007 | Health service use | 65                  | USA      |           |              |                |             |                    |                               |        |                                      |                |                         |               |                             |                        |                |                   |                     |                                   |                      |                          |                                |                      |
| Rostad                   | 2009 | Self-rated health  | 75                  | Norway   |           |              |                |             |                    |                               |        |                                      |                |                         |               |                             |                        |                |                   |                     |                                   |                      |                          |                                |                      |
| Rueda                    | 2012 | Self-rated health  | 65                  | Spain    |           |              |                |             |                    |                               |        |                                      |                |                         |               |                             |                        |                |                   |                     |                                   |                      |                          |                                |                      |
| Rueda                    | 2008 | Self-rated health  | 65                  | Spain    |           |              |                |             |                    |                               |        |                                      |                |                         |               |                             |                        |                |                   |                     |                                   |                      |                          |                                |                      |
| Rueda                    | 2009 | Self-rated health  | 65                  | Spain    |           |              |                |             |                    |                               |        |                                      |                |                         |               |                             |                        |                |                   |                     |                                   |                      |                          |                                |                      |
| Schmidt                  | 2017 | Social care use    | 60                  | Austria  |           |              |                |             |                    |                               |        |                                      |                |                         |               |                             |                        |                |                   |                     |                                   |                      |                          |                                |                      |
| Schmitz                  | 2017 | Self-rated health  | 60                  | Germany  |           |              |                |             |                    |                               |        |                                      |                |                         |               |                             |                        |                |                   |                     |                                   |                      |                          |                                |                      |
| Shea                     | 2003 | Social care use    | 75                  | Multiple |           |              |                |             |                    |                               |        |                                      |                |                         |               |                             |                        |                |                   |                     |                                   |                      |                          |                                |                      |
| Shebehe                  | 2018 | Health service use | 65                  | Sweden   |           |              |                |             |                    |                               |        |                                      |                |                         |               |                             |                        |                |                   |                     |                                   |                      |                          |                                |                      |
| Sheifer                  | 2000 | Health service use | 65                  | USA      |           |              |                |             |                    |                               |        |                                      |                |                         |               |                             |                        |                |                   |                     |                                   |                      |                          |                                |                      |
| Sherman                  | 2012 | Self-rated health  | 75                  | Sweden   |           |              |                |             |                    |                               |        |                                      |                |                         |               |                             |                        |                |                   |                     |                                   |                      |                          |                                |                      |
| Siciliani <sup>a</sup>   | 2009 | Health service use | 65                  | Multiple |           |              |                |             |                    |                               |        |                                      |                |                         |               |                             |                        |                |                   |                     |                                   |                      |                          |                                |                      |
| Sigurdardottir           | 2019 | Self-rated health  | 65                  | Iceland  |           |              |                |             |                    |                               |        |                                      |                |                         |               |                             |                        |                |                   |                     |                                   |                      |                          |                                |                      |
| Stone                    | 2015 | Self-rated health  | 64                  | UK       |           |              |                |             |                    |                               |        |                                      |                |                         |               |                             |                        |                |                   |                     |                                   |                      |                          |                                |                      |
| Sulander                 | 2012 | Self-rated health  | 75                  | Finland  |           |              |                |             |                    |                               |        |                                      |                |                         |               |                             |                        |                |                   |                     |                                   |                      |                          |                                |                      |
| Sulander                 | 2009 | Self-rated health  | 65                  | Finland  |           |              |                |             |                    |                               |        |                                      |                |                         |               |                             |                        |                |                   |                     |                                   |                      |                          |                                |                      |
| Suominen-Taipale         | 2004 | Health service use | 65                  | Multiple |           |              |                |             |                    |                               |        |                                      |                |                         |               |                             |                        |                |                   |                     |                                   |                      |                          |                                |                      |
| Tigani                   | 2012 | Self-rated health  | 100                 | Greece   |           |              |                |             |                    |                               |        |                                      |                |                         |               |                             |                        |                |                   |                     |                                   |                      |                          |                                |                      |
| Tomiak                   | 2000 | Social care use    | 65                  | Canada   |           |              |                |             |                    |                               |        |                                      |                |                         |               |                             |                        |                |                   |                     |                                   |                      |                          |                                |                      |
| Torssander               | 2016 | Health service use | 60                  | Sweden   |           |              |                |             |                    |                               |        |                                      |                |                         |               |                             |                        |                |                   |                     |                                   |                      |                          |                                |                      |
| Trachte                  | 2016 | Self-rated health  | 65                  | Germany  |           |              |                |             |                    |                               |        |                                      |                |                         |               |                             |                        |                |                   |                     |                                   |                      |                          |                                |                      |
| Van den Bosch            | 2013 | Social care use    | 65                  | Belgium  |           |              |                |             |                    |                               |        |                                      |                |                         |               |                             |                        |                |                   |                     |                                   |                      |                          |                                |                      |
| van Groenou <sup>a</sup> | 2006 | Social care use    | 65                  | Multiple |           |              |                |             |                    |                               |        |                                      |                |                         |               |                             |                        |                |                   |                     |                                   |                      |                          |                                |                      |
| van Oorti                | 2003 | Self-rated health  | 65                  | Belgium  |           |              |                |             |                    |                               |        |                                      |                |                         |               |                             |                        |                |                   |                     |                                   |                      |                          |                                |                      |
| von dem Knesebeck        | 2003 | Self-rated health  | 60                  | Multiple |           |              |                |             |                    |                               |        |                                      |                |                         |               |                             |                        |                |                   |                     |                                   |                      |                          |                                |                      |

| STUDY AUTHOR      | DATE | Outcome group      | Lower age threshold | COUNTRY     | Education | (Net) Assets | Housing tenure | House value | Housing conditions | Occupational class/employment | Income | Area deprivation or other area level | Subjective SES | Health insurance status | Car ownership | % of life working part time | Geography of residence | Marital status | Composite measure | Living arrangements | Out of pocket healthcare payments | Poverty income ratio | Poverty threshold status | Household material deprivation | Access to healthcare |
|-------------------|------|--------------------|---------------------|-------------|-----------|--------------|----------------|-------------|--------------------|-------------------------------|--------|--------------------------------------|----------------|-------------------------|---------------|-----------------------------|------------------------|----------------|-------------------|---------------------|-----------------------------------|----------------------|--------------------------|--------------------------------|----------------------|
| von dem Knesebeck | 2015 | Self-rated health  | 65                  | Germany     | ■         |              |                |             |                    | ■                             | ■      |                                      |                |                         |               |                             |                        |                |                   |                     |                                   |                      |                          |                                |                      |
| Wachelder         | 2017 | Health service use | 65                  | Netherlands |           |              |                |             |                    |                               |        | ■                                    |                |                         |               |                             |                        |                |                   |                     |                                   |                      |                          |                                |                      |
| Walker            | 2006 | Health service use | 60                  | Australia   |           |              |                |             |                    |                               | ■      |                                      |                |                         |               |                             |                        |                |                   |                     |                                   |                      |                          |                                |                      |
| Wang              | 2014 | Self-rated health  | 65                  | Japan       | ■         |              |                |             |                    |                               | ■      |                                      |                |                         |               |                             |                        |                |                   |                     |                                   |                      |                          |                                |                      |
| Wastesson         | 2014 | Health service use | 77                  | Sweden      | ■         |              |                |             |                    | ■                             | ■      |                                      |                |                         |               |                             |                        |                |                   |                     |                                   |                      |                          |                                |                      |
| Williams          | 2008 | Health service use | 65                  | US          | ■         | ■            |                |             |                    |                               |        |                                      |                |                         |               |                             |                        |                |                   |                     |                                   |                      |                          |                                |                      |

<sup>a</sup> Study population included those aged <60 years, but data presented separately for 60+ population

Table S2 Strengths and limitations of measures of socioeconomic position in older populations

| MEASURE                        | Strengths and limitations                                                                                                                                                                                                                                                                                                                                                                                                                                                                                                                                                                                                                                                                                                                                                                                                                                                                                                                                           |
|--------------------------------|---------------------------------------------------------------------------------------------------------------------------------------------------------------------------------------------------------------------------------------------------------------------------------------------------------------------------------------------------------------------------------------------------------------------------------------------------------------------------------------------------------------------------------------------------------------------------------------------------------------------------------------------------------------------------------------------------------------------------------------------------------------------------------------------------------------------------------------------------------------------------------------------------------------------------------------------------------------------|
| Education                      | <p><i>Strengths</i></p> <ul style="list-style-type: none"> <li>Data are easy to obtain, often available in cohort datasets.</li> <li>Potentially comparable between countries.</li> </ul>                                                                                                                                                                                                                                                                                                                                                                                                                                                                                                                                                                                                                                                                                                                                                                           |
|                                | <p><i>Limitations</i></p> <ul style="list-style-type: none"> <li>Level of educational attainment can be homogenous for older populations.</li> <li>Not necessarily a key driver of later life material advantage: in some countries such as the UK, labour market opportunities and conditions in 20<sup>th</sup> century may have played a more significant role than early life education in shaping employment and later life material resources.</li> <li>Gender bias may exist.</li> <li>Highest household/ family educational attainment may overcome homogeneity of this measure, but it is unclear to what extent older people benefit from the education of younger household members.</li> <li>Important to consider whether measures reflect early life educational attainment or later life education and training.</li> </ul>                                                                                                                          |
| Income                         | <p><i>Strengths</i></p> <ul style="list-style-type: none"> <li>Captures materialist pathways to inequalities.</li> </ul>                                                                                                                                                                                                                                                                                                                                                                                                                                                                                                                                                                                                                                                                                                                                                                                                                                            |
|                                | <p><i>Limitations</i></p> <ul style="list-style-type: none"> <li>Older people no longer in paid employment may be income-poor but asset rich.</li> <li>Income does not capture wealth accumulated over time through housing assets and other financial resources (e.g. savings).</li> <li>Potential difficulties collecting data where there are multiple income sources, and due to sensitivities of disclosing this type of information.</li> <li>Family and household measures of income assumes older people draw upon and benefit from the economic resources of younger family members, yet the reverse may also be true.</li> <li>Family and household measures assume older people share equal access to this resource: evidence indicates income sharing within households is not equal but varies according to numerous factors.</li> <li>Measures that include spousal income assume this resource is equally shared when this may not occur.</li> </ul> |
| Combined wealth/assets         | <p><i>Strengths</i></p> <ul style="list-style-type: none"> <li>Captures a range of older people's sources of wealth and economic resources, including those accumulated over the life course.</li> <li>Measures accounting for outgoings (net) may provide a more accurate economic profile of older people.</li> </ul>                                                                                                                                                                                                                                                                                                                                                                                                                                                                                                                                                                                                                                             |
|                                | <p><i>Limitations</i></p> <ul style="list-style-type: none"> <li>Data may be difficult to obtain for the same reasons as for <i>income</i>.</li> </ul>                                                                                                                                                                                                                                                                                                                                                                                                                                                                                                                                                                                                                                                                                                                                                                                                              |
| Occupational class/ employment | <p><i>Strengths</i></p> <ul style="list-style-type: none"> <li>Easy to obtain and widely available in cohort datasets.</li> </ul>                                                                                                                                                                                                                                                                                                                                                                                                                                                                                                                                                                                                                                                                                                                                                                                                                                   |
|                                | <p><i>Limitations</i></p> <ul style="list-style-type: none"> <li>Poor applicability to a largely retired population.</li> <li>Although considered a proxy for lifetime earnings, longest held or main occupation is not necessarily a reflection of later life advantage due to compounding role of health/ disability.</li> <li>May overlook older women, many of whom were absent from labour workforce at working age, and/or have interrupted employment histories due to child-rearing and caring roles.</li> <li>Employment 'status' that distinguishes only between those employed and not employed will not capture variations in disadvantage in older populations.</li> </ul>                                                                                                                                                                                                                                                                             |
| Home ownership                 | <p><i>Strengths</i></p> <ul style="list-style-type: none"> <li>Captures a key component of older people's economic circumstance.</li> </ul>                                                                                                                                                                                                                                                                                                                                                                                                                                                                                                                                                                                                                                                                                                                                                                                                                         |
|                                | <p><i>Limitations</i></p> <ul style="list-style-type: none"> <li>Potentially a homogenous measure due to high levels of home ownership amongst older people in countries where home ownership is the norm.</li> <li>A dichotomised measure of ownership masks enormous regional differentials in accumulated housing wealth.</li> </ul>                                                                                                                                                                                                                                                                                                                                                                                                                                                                                                                                                                                                                             |

|                                                |                                                                                                                                                                                                                                                                                                                                                                                                                                                                                                                                                                                                                                                                                                                                                                                  |
|------------------------------------------------|----------------------------------------------------------------------------------------------------------------------------------------------------------------------------------------------------------------------------------------------------------------------------------------------------------------------------------------------------------------------------------------------------------------------------------------------------------------------------------------------------------------------------------------------------------------------------------------------------------------------------------------------------------------------------------------------------------------------------------------------------------------------------------|
|                                                | <ul style="list-style-type: none"> <li>• Home ownership may not signal accumulated wealth in countries where this is not the norm.</li> <li>• Similar to income, captures only one aspect of older people's economic resources.</li> </ul>                                                                                                                                                                                                                                                                                                                                                                                                                                                                                                                                       |
| <b>Subjective measures</b>                     | <p><i>Strengths</i></p> <ul style="list-style-type: none"> <li>• May overcome limitations of objective measures in older populations (accessing sensitive data about a wide range of economic resources).</li> </ul> <p><i>Limitations</i></p> <ul style="list-style-type: none"> <li>• Subjective assessments of economic circumstance are influenced by macro-economic factors (recessions income inequality, modernisation), undermining comparability of this measure over time and between countries where these conditions change/differ.</li> <li>• Not clear to what extent subjective assessments represent a valid measure of socioeconomic position in later life.</li> </ul>                                                                                         |
| <b>Area deprivation measures</b>               | <p><i>Strengths</i></p> <ul style="list-style-type: none"> <li>• Area deprivation may give some indication of property value, an important component of accumulated wealth in older populations.</li> <li>• Easy to obtain and widely available in datasets.</li> <li>• May have value where area-level deprivation and social environment is thought to underlie health inequalities.</li> </ul> <p><i>Limitations</i></p> <ul style="list-style-type: none"> <li>• Prone to ecological fallacy: those living in poor areas may not be poor themselves.</li> <li>• Many area deprivation measures typically draw upon indicators more relevant to working age populations, although the Indices of Multiple Deprivation includes a sub-domain for older populations.</li> </ul> |
| <b>House value</b>                             | <p><i>Strengths</i></p> <ul style="list-style-type: none"> <li>• Captures accumulated wealth over time for older populations.</li> </ul> <p><i>Limitations</i></p> <ul style="list-style-type: none"> <li>• House value data may be difficult to collect if participants unwilling or unable to disclose, although approximate market valuations can be obtained independently.</li> </ul>                                                                                                                                                                                                                                                                                                                                                                                       |
| <b>Household material deprivation</b>          | <p><i>Strengths</i></p> <ul style="list-style-type: none"> <li>• Captures materialist pathways to inequality.</li> <li>• Important when household environment is thought to contribute to poor health.</li> </ul> <p><i>Limitations</i></p> <ul style="list-style-type: none"> <li>• Housing conditions may reflect availability of financial resources, which is only one aspect of older people's economic capital.</li> </ul>                                                                                                                                                                                                                                                                                                                                                 |
| <b>Health insurance status</b>                 | <p><i>Strengths</i></p> <ul style="list-style-type: none"> <li>• May be a useful proxy indicator of income in the absence of income data.</li> </ul> <p><i>Limitations</i></p> <ul style="list-style-type: none"> <li>• May be less appropriate in countries where health insurance is not widely used.</li> <li>• Dichotomised response categories risk minimising substantial socioeconomic variation in older populations.</li> </ul>                                                                                                                                                                                                                                                                                                                                         |
| <b>Car ownership</b>                           | <p><i>Strengths</i></p> <ul style="list-style-type: none"> <li>• Easy data to obtain.</li> </ul> <p><i>Limitations</i></p> <ul style="list-style-type: none"> <li>• Car ownership signals more than material resources and is compounded by the health and independence of the individual.</li> </ul>                                                                                                                                                                                                                                                                                                                                                                                                                                                                            |
| <b>Geography profile of residence</b>          | <p><i>Strengths</i></p> <ul style="list-style-type: none"> <li>• Easy data to obtain.</li> </ul> <p><i>Limitations</i></p> <ul style="list-style-type: none"> <li>• On its own, geographical profile of residence (e.g. urban/rural) unlikely to capture variations in socioeconomic inequalities.</li> <li>• May be more relevant in countries where clear socioeconomic inequalities existing between rural and urban areas.</li> <li>• Unclear to what extent this represents a valid measure of socioeconomic position.</li> </ul>                                                                                                                                                                                                                                           |
| <b>Living arrangements (alone/with others)</b> | <p><i>Limitations</i></p>                                                                                                                                                                                                                                                                                                                                                                                                                                                                                                                                                                                                                                                                                                                                                        |



|                                                                                    |                                                                                                                                                                                                                                                                                                                                                                                                                                                                                                                                        |
|------------------------------------------------------------------------------------|----------------------------------------------------------------------------------------------------------------------------------------------------------------------------------------------------------------------------------------------------------------------------------------------------------------------------------------------------------------------------------------------------------------------------------------------------------------------------------------------------------------------------------------|
|                                                                                    | <ul style="list-style-type: none"> <li>• Unclear what pathway to socioeconomic inequality is captured by this measure.</li> <li>• Unclear how this measure would accommodate those living in residential care with/without nursing.</li> </ul>                                                                                                                                                                                                                                                                                         |
| <b>Proportion of life working part time</b>                                        | <p><i>Strengths</i></p> <ul style="list-style-type: none"> <li>• May give some proxy indication of accumulated financial resources.</li> </ul> <p><i>Limitations</i></p> <ul style="list-style-type: none"> <li>• May overlook older women, many of whom were absent from labour workforce at working age, and/or have interrupted employment histories due to child-rearing and caring roles.</li> </ul>                                                                                                                              |
| <b>Marital status</b>                                                              | <p><i>Limitations</i></p> <ul style="list-style-type: none"> <li>• Unclear what pathway to socioeconomic inequality is captured by this measure.</li> <li>• For the oldest old, populations may be biased towards widowed status.</li> </ul>                                                                                                                                                                                                                                                                                           |
| <b>Perceived access to healthcare</b>                                              | <p><i>Limitations</i></p> <ul style="list-style-type: none"> <li>• Unclear what pathway to socioeconomic inequality is captured by this measure.</li> </ul>                                                                                                                                                                                                                                                                                                                                                                            |
| <b>Out of pocket payments for healthcare</b>                                       | <p><i>Limitations</i></p> <ul style="list-style-type: none"> <li>• Only appropriate in context of non-universal care systems.</li> <li>• Unclear whether out of pocket payments reflects advantage (greater ability to pay for care) or disadvantage (having poorer health insurance coverage).</li> </ul>                                                                                                                                                                                                                             |
| <b>Poverty Income Ratio/ threshold status/income as % of federal poverty level</b> | <p><i>Strengths</i></p> <ul style="list-style-type: none"> <li>• May be easier to access than income data.</li> <li>• Could be used as a proxy for unavailable income data.</li> </ul> <p><i>Limitations</i></p> <ul style="list-style-type: none"> <li>• Dichotomised response measure may mask substantial socioeconomic differences among older populations.</li> <li>• When based on income, faces the same challenges as direct measures of income (i.e. captures only one aspect of older people's financial capital)</li> </ul> |



**Table S3. Split of study samples between categories of educational attainment and home ownership**

| Study            | Split of sample by categories of education (%)                                                                                                                                       | Split of sample by categories of home ownership (%)                                                                                                                                                                                                                              | Country     |
|------------------|--------------------------------------------------------------------------------------------------------------------------------------------------------------------------------------|----------------------------------------------------------------------------------------------------------------------------------------------------------------------------------------------------------------------------------------------------------------------------------|-------------|
| Adjei 2017       | US<br>Male/Female<br>Incomplete Secondary school or less: 21.5/21.3<br>Secondary completed: 31.7/38.4<br>Tertiary Completed or above: 46.9/40.3                                      | US<br>Home owner: 84.3<br>Non-home owner: 15.7<br><br>UK<br>Home owner: 72.6<br>Non-home owner: 27.4<br><br>Italy<br>Home owner: 83.1<br>Non-home owner: 16.9<br><br>Spain<br>Home owner: 90.1<br>Non-home owner: 9.9<br><br>Germany<br>Home owner: 58.9<br>Non-home owner: 41.1 | Multiple    |
|                  | UK<br>Male/Female<br>Incomplete secondary school or less: 63.3/76.5<br>Secondary completed: 18.5/13.5<br>Tertiary completed or above: 18.3/10.0                                      |                                                                                                                                                                                                                                                                                  |             |
|                  | Italy<br>Male/Female<br>Incomplete sec. or less: 67.5/80.1<br>Secondary completed: 27.7/17.9<br>Tertiary completed or above: 4.8/2.1                                                 |                                                                                                                                                                                                                                                                                  |             |
|                  | Spain<br>Male/Female<br>Incomplete sec. or less: 69.3/77.7<br>Secondary completed: 23.2/18.5<br>Tertiary completed or above: 8.5/3.9                                                 |                                                                                                                                                                                                                                                                                  |             |
|                  | Germany<br>Male/Female<br>Incomplete Sec. or less: 10.7/28.9<br>Secondary completed: 41.8/53.6<br>Tertiary Completed or above: 47.5/17.5                                             |                                                                                                                                                                                                                                                                                  |             |
| Ahn 2012         | <High school: 18.6<br>High school: 34.3<br>>High school: 47.1                                                                                                                        | NA                                                                                                                                                                                                                                                                               | US          |
| Aida 2011        | <6 years: 3.5<br>6-9 years: 50.5<br>10-12 years: 33.7<br>13+ years: 12.3                                                                                                             | NA                                                                                                                                                                                                                                                                               | Japan       |
| Allen 2011       | Rural/urban<br>< Secondary school: 31.1/32.9<br>Secondary school graduation: 10.9/17.0<br>Some post-secondary school education: 10.1/7.3<br>Post secondary degree/diploma: 47.9/42.9 | NA                                                                                                                                                                                                                                                                               | Canada      |
| Ament 2012       | High education level: 10.9<br>Low education level: 89.1                                                                                                                              | NA                                                                                                                                                                                                                                                                               | Netherlands |
| Auchincloss 2001 | No high school: 22.5<br>Some high school: 15.9<br>High school degree: 35.8<br>College: 25.8                                                                                          | NA                                                                                                                                                                                                                                                                               | US          |

|                          |                                                                                                                                                                                                                             |                                                                                                                                                       |                         |
|--------------------------|-----------------------------------------------------------------------------------------------------------------------------------------------------------------------------------------------------------------------------|-------------------------------------------------------------------------------------------------------------------------------------------------------|-------------------------|
| Cain 2017                | No high school diploma: 17.0<br>HS graduate: 25.0<br>Some college—no degree: 25.0<br>College degree (undergraduate): 18.0<br>Grad or prof degree: 15.0                                                                      | NA                                                                                                                                                    | US                      |
| Connelly 2010            | Data not extracted due to volume. Reader is referred to original publication.                                                                                                                                               | Owner: 71.0<br>Renter: 29.0                                                                                                                           | Northern Ireland        |
| Dalstra 2006             | Not reported due to volume. Reader is referred to table 2 of original publication. Authors note that across countries, the proportion of participants was typically larger in the lowest educational attainment categories. | Not reported, but authors note that there was much variability between countries in the distribution of participants between home owners and renters. | Europe                  |
| Enroth 2013              | Male/Female:<br>High educated: 20.0/11.0<br>Middle educated: 30.0/17.0<br>Low educated: 47.0/68.0<br>Education unknown: 3.0/4.0                                                                                             | NA                                                                                                                                                    | US                      |
| Enroth 2019              | Sweden<br>Basic: 47.2<br>Higher: 52.8<br><br>Norway<br>Basic: 33.2<br>Higher: 66.8<br><br>Denmark<br>Basic: 47.7<br>Higher: 52.3                                                                                            | NA                                                                                                                                                    | Sweden, Denmark, Norway |
| Fernandez-Martinez 2000  | < Elementary school: 31.6<br>Elementary school: 38.1<br>Middle/high school or higher: 30.3                                                                                                                                  | NA                                                                                                                                                    | Spain                   |
| Fernandez-Mayorales 2000 | Higher studies: 5.0<br>Secondary: 49.5<br>< Primary: 45.5                                                                                                                                                                   | NA                                                                                                                                                    | Spain                   |
| Fors 2015                | 1992<br>Grade school or less: 76.9<br>Beyond grade school: 23.1<br><br>2002<br>Grade school or less: 68.2<br>Beyond grade school: 38.1<br><br>2011<br>Grade school or less: 57.7<br>Beyond grade school: 42.3               | NA                                                                                                                                                    | Sweden                  |
| Francois 2011            | No info: 3.9<br>No degree or primary: 34.7<br>Lower secondary: 24.4<br>Higher secondary: 21.7<br>Higher education: 15.3                                                                                                     | NA                                                                                                                                                    | Belgium                 |

|                 |                                                                                                                                                                                                                                                                     |                                                                |                     |
|-----------------|---------------------------------------------------------------------------------------------------------------------------------------------------------------------------------------------------------------------------------------------------------------------|----------------------------------------------------------------|---------------------|
| Franse 2017     | Tertiary: 10.5<br>Secondary: 56.7<br>Primary: 32.8                                                                                                                                                                                                                  | NA                                                             | Netherlands         |
| Freedman 2004   | Plans A & B/HMO enrollees/FFS enrollees<br>High school degree: 38.2/32.0/35.0<br>No degree: 61.8/68.0/65.0                                                                                                                                                          | NA                                                             | US                  |
| Giron 2012      | Illiterate or no education: 37.1<br>Primary and secondary 1st cycle: 49.7<br>Second cycle secondary and post-secondary: 7.2<br>university: 6.1                                                                                                                      | NA                                                             | Spain               |
| Gomez-Baya 2020 | No studies 7.7<br>Primary 27.9<br>Secondary, professional training 30.8<br>University degree 30.4<br>University Post-degree 2.9<br>No answer 0.3                                                                                                                    | NA                                                             | Spain               |
| Grau 2001       | <High school: 24.0<br>High school: 41.0<br>Post-high school: 34.0                                                                                                                                                                                                   | NA                                                             | US                  |
| Grundy 2007     | NA                                                                                                                                                                                                                                                                  | Home owner: 68.4<br>Social tenant: 25.6<br>Private tenant: 6.0 | UK                  |
| Hancock 2002    | NA                                                                                                                                                                                                                                                                  | Home owner: 49.3<br>Non-home owner: 50.7                       | UK                  |
| Hoeck 2013      | No information: 2.9<br>No degree or primary: 28.7<br>Lower secondary: 24.6<br>Higher secondary: 26.2<br>Higher education: 17.6                                                                                                                                      | Home owner: 75.4<br>Non-home owner: 24.6                       | Belgium             |
| Honjo 2006      | 13+ years: 34.0<br>12 years: 35.2<br>11 years: 30.8                                                                                                                                                                                                                 | NA                                                             | Japan               |
| Howard 2006     | High school degree: 64.2<br>No high school degree: 35.8                                                                                                                                                                                                             | NA                                                             | US                  |
| Huijts 2010     | Denmark, Men:<br>Primary: 16.0<br>Secondary: 44.9<br>Tertiary: 39.1<br><br>Denmark, Women:<br>Primary: 20.0<br>Secondary: 34.1<br>Tertiary: 45.1<br><br>Finland, Men:<br>Primary: 33.9<br>Secondary: 37.9<br>Tertiary: 28.3<br><br>Finland, Women:<br>Primary: 33.9 | NA                                                             | Finland,<br>Denmark |

|                          |                                                                                                                                                                            |                                                                                      |         |
|--------------------------|----------------------------------------------------------------------------------------------------------------------------------------------------------------------------|--------------------------------------------------------------------------------------|---------|
|                          | Secondary: 29.4<br>Tertiary: 36/7                                                                                                                                          |                                                                                      |         |
| Illoabuchi<br>2014       | < 12 years of education: 67<br>> 12 years of education: 33                                                                                                                 | NA                                                                                   | US      |
| Jenkins 2020             | NA                                                                                                                                                                         | Non-home owners: 11.7<br>Owner: 88.3                                                 | US      |
| Kim 2011                 | Elementary school: 62.1<br>Middle school: 14.4<br>High school: 23.4                                                                                                        | NA                                                                                   | Korea   |
| Kim 2011                 | None: 8.57<br>1 - 11 years: 27.49<br>>12 years: 63.94                                                                                                                      | NA                                                                                   | Korea   |
| Knurowski<br>2005        | Basic or lower: 32.4<br>secondary: 45.6<br>University: 22.0                                                                                                                | Home owners: 66.0<br>Non-home owner: 34.0                                            | Poland  |
| Lee 2020                 | < High school: 12.4<br>High school: 30.3<br>Attended college: 28.3<br>Graduated college: 29.0                                                                              | NA                                                                                   | US      |
| Lindenaur<br>2003        | NA                                                                                                                                                                         | Non-home owner: 37.7<br>Home owner: 62.3                                             | US      |
| Lopez-de-<br>Andres 2018 | EHSS 2009<br>No studies/primary: 84.7<br>Secondary: 10.3<br>Higher education: 5.0<br><br>EHSS 2014<br>No studies/primary: 82.5<br>Secondary: 10.0<br>Higher education: 7.5 | NA                                                                                   | Spain   |
| Luchetti 2010            | Under 5 years: 24.5<br>Over 5 years: 75.5                                                                                                                                  | NA                                                                                   | Italy   |
| Lum 2004                 | No high school diploma: 43.4<br>High school diploma: 29.5<br>Some college: 14.8<br>College: 12.2                                                                           | NA                                                                                   | US      |
| Lupi-Pegurier<br>2011    | < Baccalaureate: 33.8<br>Baccalaureate: 52.7<br>> Baccalaureate: 13.5                                                                                                      | NA                                                                                   | France  |
| Maniecka-<br>Bryła 2011  | Tertiary: 21.2<br>Secondary: 30.5<br>Vocational: 7.3<br>Primary: 41.0                                                                                                      | NA                                                                                   | Poland  |
| Martikainen<br>2008      | Men<br>Basic: 79.1<br>Intermediate: 11.0<br>Tertiary: 9.9<br><br>Women<br>Basic: 78.4                                                                                      | Men<br>Owner: 67.8<br>Non-owner: 32.2<br><br>Women<br>Owner: 69.8<br>Non-owner: 30.2 | Finland |

|               |                                                                                                                                                                                                                                                                                                                 |                                                                                   |           |
|---------------|-----------------------------------------------------------------------------------------------------------------------------------------------------------------------------------------------------------------------------------------------------------------------------------------------------------------|-----------------------------------------------------------------------------------|-----------|
|               | Intermediate: 13.3<br>Tertiary: 8.3                                                                                                                                                                                                                                                                             |                                                                                   |           |
| Mather 2014   | 65-79<br>No school certificate: 14.8<br>School cert: 25.5<br>Higher school cert: 22.9<br>Cert or diploma: 18.9<br>University+: 18.0<br><br>80+<br>No school certificate: 18.3<br>School cert: 25.8<br>Higher school cert: 23.9<br>Cert or diploma: 16.9<br>University+: 15.1                                    | NA                                                                                | Australia |
| McCann 2011   | NA                                                                                                                                                                                                                                                                                                              | Renters: 28.0<br>Non-renters: 72.0                                                | UK        |
| Nicklett 2011 | < High school: 76.5<br>High school: 14.3<br>Some college or more: 9.2                                                                                                                                                                                                                                           | NA                                                                                | US        |
| Niefield 2005 | 0-8 years/don't know: 51.0<br>9-13+ years: 49.0                                                                                                                                                                                                                                                                 | Home owner: 20.0<br>Non-home owner: 80.0                                          | US        |
| Nieman 2014   | < High school: 11.8<br>Some high school 15.7<br>High school graduate 29.4<br>Some college or associates degree 23.7<br>College graduate or above 19.4                                                                                                                                                           | NA                                                                                | US        |
| Nihtila 2007  | Female/Male<br>Tertiary: 8.0/13.6<br>Intermediate: 13.6/12.3<br>Basic or less: 78.4/74.1                                                                                                                                                                                                                        | Female/Male<br>Owner: 78.1/83.8<br>Renter: 18.0/12.7<br>Other or unknown: 3.8/3.5 | Finland   |
| Orfila 2000   | 65-74<br>High school or university: 26.5<br>Primary school: 61.9<br>Unable to read or write: 11.7<br><br>72-79<br>High school or university: 20.9<br>Primary school: 72.9<br>Unable to read or write: 6.2<br><br>80+<br>High school or university: 13.6<br>Primary school: 79.7<br>Unable to read or write: 6.8 | NA                                                                                | Spain     |
| Low 2009      | < Secondary School: 40.4%<br>Secondary graduates: 13.1%<br>Post secondary education: 43.5%                                                                                                                                                                                                                      | NA                                                                                | Canada    |
| Park 2014     | Male/Female<br>Primary school: 47.4/84.9<br>Middle school: 17.0/8.7                                                                                                                                                                                                                                             | NA                                                                                | Korea     |

|                      |                                                                                                                                                                                                                                                                                                                                        |    |        |
|----------------------|----------------------------------------------------------------------------------------------------------------------------------------------------------------------------------------------------------------------------------------------------------------------------------------------------------------------------------------|----|--------|
|                      | High school: 22.0/5.1<br>College+: 14.0/1.3                                                                                                                                                                                                                                                                                            |    |        |
| Prajsner 2015 & 2016 | No education: 1.4<br>Primary incomplete: 9.5<br>Primary: 39.1<br>Vocational: 17.5<br>Secondary: 21.6<br>Higher: 10.9                                                                                                                                                                                                                   | NA | Poland |
| Reyes-Ortiz 2010     | 0-5 years: 51.2<br>5+ years: 48.8                                                                                                                                                                                                                                                                                                      | NA | US     |
| Roe-Prior 2007       | <High school: 42.0<br>High school diploma: 31.0<br>Post high school: 29.0                                                                                                                                                                                                                                                              | NA | US     |
| Rostad 2009          | >12 years: 4.0<br>8-11 years: 27.0<br><7 years: 69.0                                                                                                                                                                                                                                                                                   | NA | Norway |
| Rueda 2008           | Male/Female<br>Without formal education: 6.5/9.9<br>Primary education or less: 31.5/34.5<br>Secondary education: 43.2/44.5<br>Higher than secondary education: 17.9/9.8                                                                                                                                                                | NA | Spain  |
| Rueda 2009           | Women:<br>> Primary schooling: 17.8<br>Primary: 30.7<br>< Primary: 51.5<br><br>Men:<br>> Primary schooling: 30.2<br>Primary: 33.8<br>< Primary: 36.0                                                                                                                                                                                   | NA | Spain  |
| Rueda 2012           | BASQUE<br>Primary +: 40.2/22.4<br>Primary: 49.0/61.5<br><Primary: 10.8/16.1<br><br>NAVARRA<br>Primary +: 17.5/10.9<br>Primary: 59.5/64.5<br><Primary: 23.0/24.6<br><br>ANDALUSIA<br>Primary +: 16.9/8.4<br>Primary: 35.5/29.4<br><Primary: 47.6/62.2<br><br>MURCIA<br>Primary +: 17.3/4.5<br>Primary: 34.6/29.9<br><Primary: 48.1/65.6 | NA | Spain  |
| Shea 2003            | US<br>< High school: 35.4                                                                                                                                                                                                                                                                                                              | NA | US     |



|                        |                                                                                                                                                           |                                                                   |         |
|------------------------|-----------------------------------------------------------------------------------------------------------------------------------------------------------|-------------------------------------------------------------------|---------|
|                        | Some high school: 42.2<br>Some college: 22.4<br><br>Sweden<br>< High school: 68.2<br>Some high school: 14.3<br>Some college: 17.5                         |                                                                   |         |
| Sherman 2012           | Elementary: 49.0<br>Upper sec: 29.0<br>University: 20.0<br>Missing: 2.0                                                                                   | NA                                                                | Sweden  |
| Sulander 2012          | Male/Female<br>Secondary: 58.8/46.0<br>Middle: 18.8/29.8<br>Elementary: 22.4/24.3                                                                         | NA                                                                | Finland |
| Suominen-Taipale 2004  | Primary school: 49.0<br>Middle level: 25.0<br>University: 8.0                                                                                             | NA                                                                | Norway  |
| Suominen-Taipale 2004  | Primary school: 57.0<br>Middle level: 30.0<br>University: 8.0                                                                                             | NA                                                                | Finland |
| Tigani 2012            | Illiterate: 42.8<br>Unfinished primary: 30.8<br>Primary: 14.0<br>Unfinished secondary: 3.3<br>Secondary: 4.5<br>Unfinished tertiary: 0.5<br>Tertiary: 3.5 | NA                                                                | Greece  |
| Tomiak 2000            | Male/Female, Years in Education<br>Quartile 1: 24.1/22.3<br>Quartile 2: 26.2/27.4<br>Quartile 3: 23.9/24.2<br>Quartile 4: 25.8/26.1                       | Male/Female<br>Home owner: 77.9/64.1<br>Non-home owner: 22.1/35.9 | Canada  |
| Trachte 2016           | Men:<br>High: 27.6<br>Medium: 12.5<br>Low: 59.9<br><br>Women:<br>High: 11.5<br>Medium: 18.6<br>Low: 69.9                                                  | NA                                                                | Germany |
| von dem Knesebeck 2003 | 0-9 years: 9.4<br>10-12 years: 44.9<br>13+ years: 45.7                                                                                                    | Home owner: 82.5<br>Non-home owner: 17.7                          | US      |
|                        | 0-9 years: 54.3<br>10-12 years: 27.5<br>13+ years: 18.2                                                                                                   | Home owner: 54.0<br>Non-home owner: 46.00                         | Germany |
| von dem Knesebeck 2015 | Inadequately completed general education: 1.3<br>General elementary education: 13.6<br>Basic vocational qualification or general elementary               | NA                                                                | Germany |

|                |                                                                                                                                                                                                                                                                                                                                                                                                       |    |        |
|----------------|-------------------------------------------------------------------------------------------------------------------------------------------------------------------------------------------------------------------------------------------------------------------------------------------------------------------------------------------------------------------------------------------------------|----|--------|
|                | education and vocational qualification: 46.0<br>Intermediate general qualification: 2.5<br>Intermediate vocational or intermediate general qualification and vocational qualification: 19.9<br>General maturity certificate: 1.1<br>Vocational maturity certificate/general maturity certificate and vocational qualification: 4.0<br>Lower tertiary education: 4.8<br>Higher tertiary education: 7.0 |    |        |
| Wastesson 2014 | Low: 56.5<br>Medium: 28.1<br>High: 15.4                                                                                                                                                                                                                                                                                                                                                               | NA | Sweden |
